# Supplementary material for: Metagenome-assembled genomes of phytoplankton microbiomes from the Arctic and Atlantic Oceans
Source: PubMed Central journal article supplement (PMC9047304; doi:10.1186/s40168-022-01254-7), 2022-04-28
Supplement: 40168_2022_1254_MOESM7_ESM.pdf [file 40168_2022_1254_MOESM7_ESM.pdf]

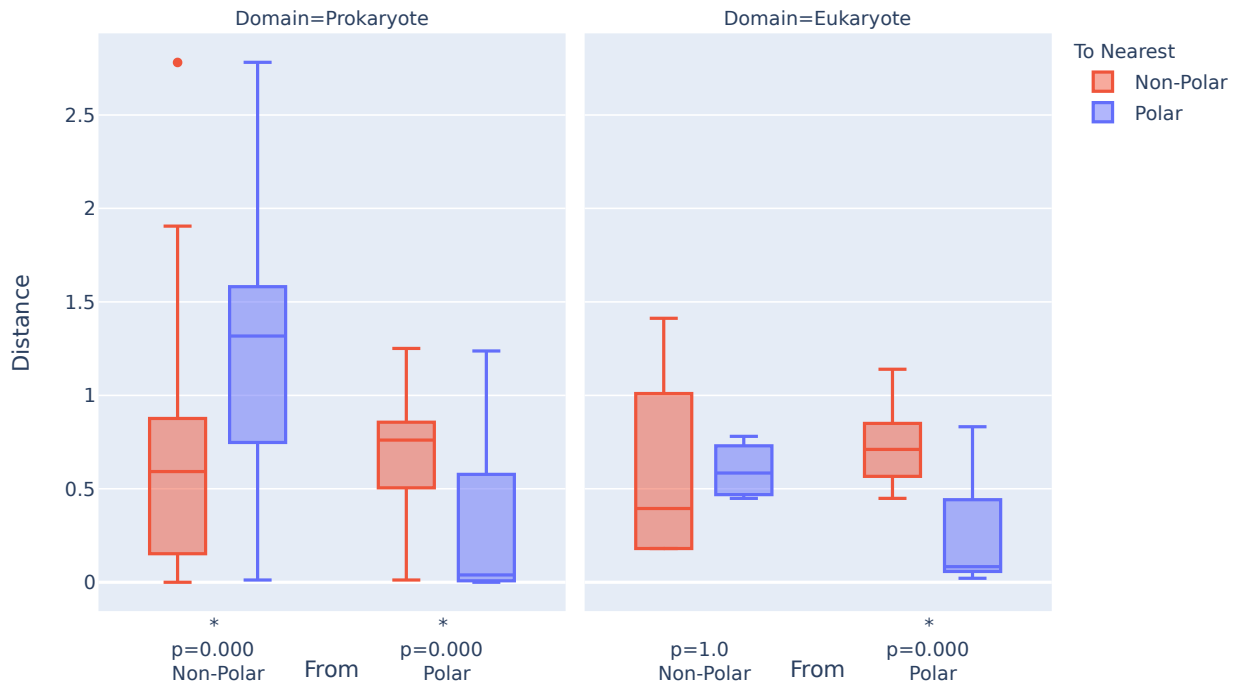

Distribution of the distance from each MAG to the near Polar or Non-Polar MAG. The MAG being measured from is split on the x-axis, the distance to the nearest MAG from either Polar or Non-Polar is indicated by colour. Difference in median between distances to Polar/Non-Polar assessed using Mood's median test, p-values given on x-axis.
