# Supplementary material for: Metagenome-assembled genomes of phytoplankton microbiomes from the Arctic and Atlantic Oceans
Source: PubMed Central journal article supplement (PMC9047304; doi:10.1186/s40168-022-01254-7), 2022-04-28

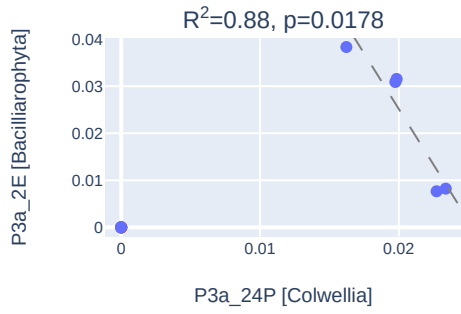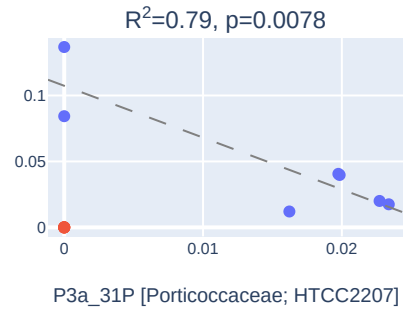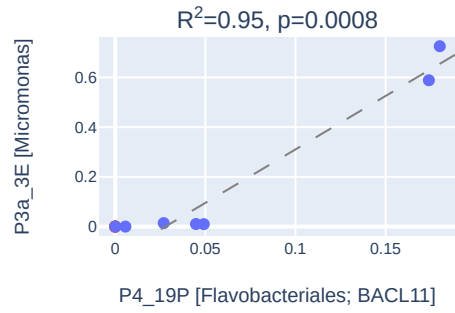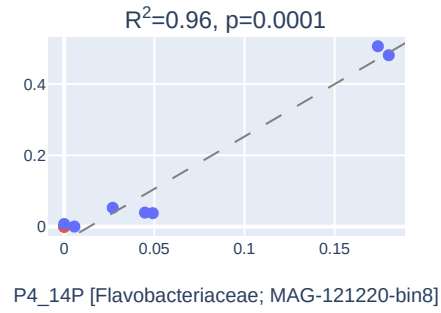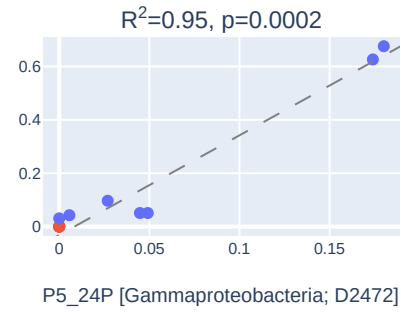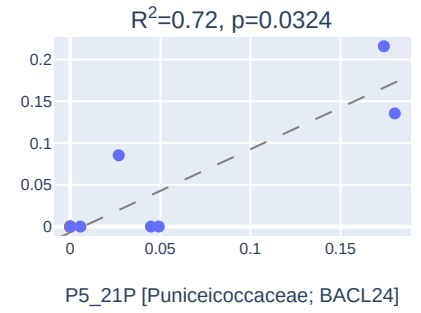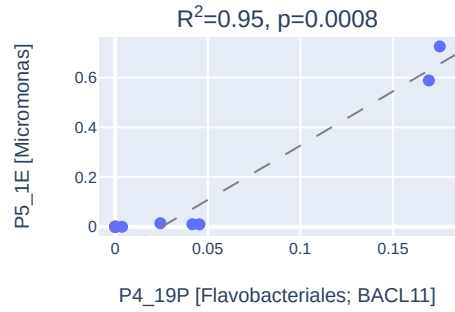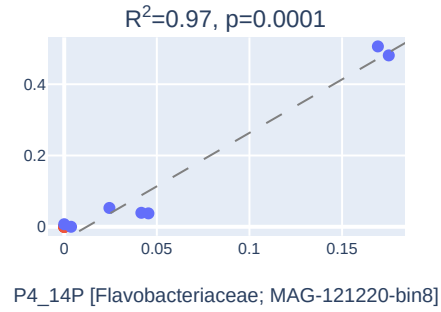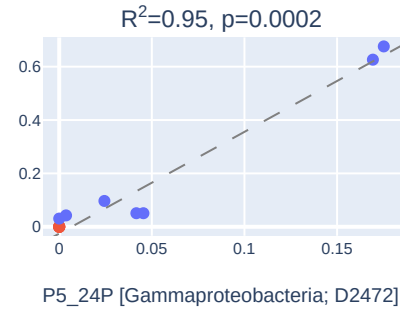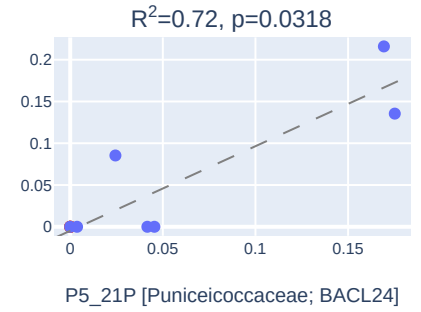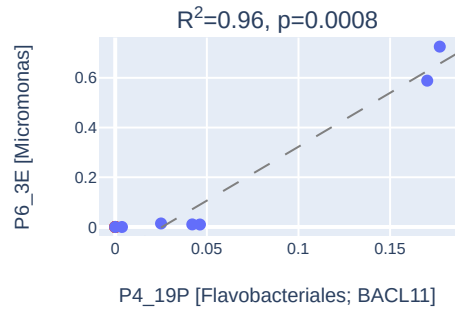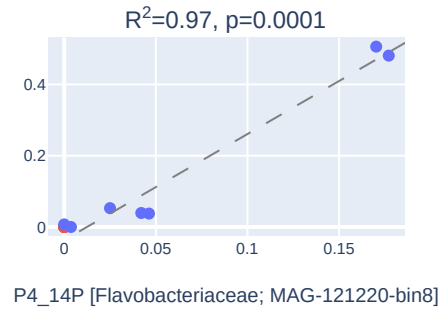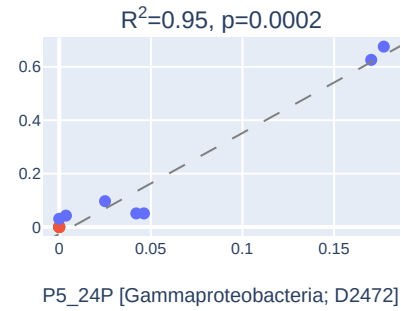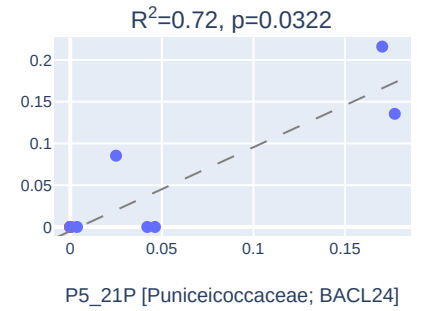

Supplement: 40168_2022_1254_MOESM9_ESM.pdf [file 40168_2022_1254_MOESM9_ESM.pdf]
